# Supplementary material for: The aggregation of casein micelles induced by Ca2+ during in vitro digestion: effects on the release of loaded anthocyanins
Source: Royal Society of Chemistry journal article supplement (doi:10.1039/d3fo03684g), 2023-12-08
Supplement: d3fo03684g1.pdf [file d3fo03684g1.pdf]

## Electronic Supplementary Information

### Aggregation of casein micelles induced by $\text{Ca}^{2+}$ during *in vitro* digestion: Effects on the release of loaded anthocyanins

Jinbo Ren <sup>a, b</sup>, Minjie Liao <sup>a</sup>, Kaixin Li <sup>a</sup>, Fang Chen <sup>a</sup>, Xiaosong Hu <sup>a, b</sup>, Lingjun Ma <sup>a, b\*</sup>, Junfu Ji <sup>a, b\*</sup>

<sup>a</sup> College of Food Science and Nutritional Engineering, National Engineering Research Center for Fruit and Vegetable Processing, China Agricultural University, Key Lab of Fruit and Vegetable Processing, Ministry of Agriculture and Rural Affairs, Beijing 100083, China

<sup>b</sup> Xinghua Industrial Research Centre for Food Science and Human Health, China Agricultural University, Xinghua 225700, China

\* Corresponding authors.

Tel: +86-10-62737434; Fax: +86-10-62737645-18

E-mail address: lingjun.ma@cau.edu.cn; junfu.ji@cau.edu.cn

**Table S1** Preparation protocol for electrolyte stock solutions (800 mL) of Simulated Gastric Fluid (SGF) and Simulated Intestinal Fluid (SIF).

|                       | KCl   | KH <sub>2</sub> PO <sub>4</sub> | NaCl  | NaCl  | MgCl <sub>2</sub> (H <sub>2</sub> O) <sub>6</sub> | (NH <sub>4</sub> ) <sub>2</sub> CO <sub>3</sub> | HCl  | H <sub>2</sub> O |
|-----------------------|-------|---------------------------------|-------|-------|---------------------------------------------------|-------------------------------------------------|------|------------------|
| Concentration (mol/L) | 0.5   | 0.5                             | 1     | 2     | 0.15                                              | 0.5                                             | 6    | N/A              |
| SGF (μL)              | 13800 | 1800                            | 25000 | 23600 | 800                                               | 1000                                            | 2600 | 731400           |
| SIF (μL)              | 13600 | 1600                            | 85000 | 19200 | 2200                                              | N/A                                             | 1400 | 677000           |

CaCl<sub>2</sub> is not included in the electrolyte stock solution. It will be added immediately before use.

**Table S2** Droplet size of micellar casein solutions after different degrees of atomization.

| Sample                               | SD              | FD   | SFD-L                | SFD-M             | SFD-S           |
|--------------------------------------|-----------------|------|----------------------|-------------------|-----------------|
| Droplet size D(50) ( $\mu\text{m}$ ) | $4.3 \pm 0.2^c$ | N/A* | $2910.3 \pm 159.7^a$ | $138.0 \pm 4.9^b$ | $3.5 \pm 0.1^c$ |

Values with different superscript letters in each line are significantly different ( $p < 0.05$ ).

\* FD samples are not atomized.
